# Supplementary material for: Electronic, optical and thermoelectric properties of a novel two-dimensional SbXY (X = Se, Te; Y = Br, I) family: ab initio perspective
Source: Royal Society of Chemistry journal article supplement (doi:10.1039/d1cp03706d), 2021-01-01
Supplement: d1cp03706d1.pdf [file d1cp03706d1.pdf]

## A novel two-dimensional SbXY (X=Se,Te; Y =Br,I) family : A First principles study of the electronic, optical and thermo electric properties

A. Bafekry<sup>1,†</sup>, M. Faraji<sup>2</sup>, M. M. Fadlallah<sup>3</sup>, D. M. Hoat<sup>4,5</sup>, H. R. Jappor<sup>6</sup>, I. Abdolhosseini Sarsari<sup>7</sup>, M. Ghergherehchi<sup>8,†</sup>, S.A.H. Fegghi<sup>1,†</sup>,

<sup>1</sup> Department of Radiation Application, Shahid Beheshti University, 19839 69411 Tehran, Iran.

<sup>2</sup> TOBB University of Economics and Technology, Sogutozu Caddesi No 43 Sogutozu, 06560, Ankara, Turkey.

<sup>3</sup> Department of Physics, Faculty of Science, Benha University, 13518 Benha, Egypt.

<sup>4</sup> Institute of Theoretical and Applied Research, Duy Tan University, Hanoi 100000, Vietnam.

<sup>5</sup> Faculty of Natural Sciences, Duy Tan University, Da Nang 550000, Vietnam.

<sup>6</sup> Department of Physics, College of Education for Pure Sciences, University of Babylon, Hilla, Iraq.

<sup>7</sup> Department of Physics, Isfahan University of Technology, Isfahan, 84156-83111, Iran. <sup>8</sup> Department of Electrical and Computer Engineering, Sungkyunkwan University, 16419 Suwon, Korea. Email: mitragh@skku.edu

† To whom correspondence should be addressed. Email: bafekry.asad@gmail.com and Email: mitragh@skku.edu

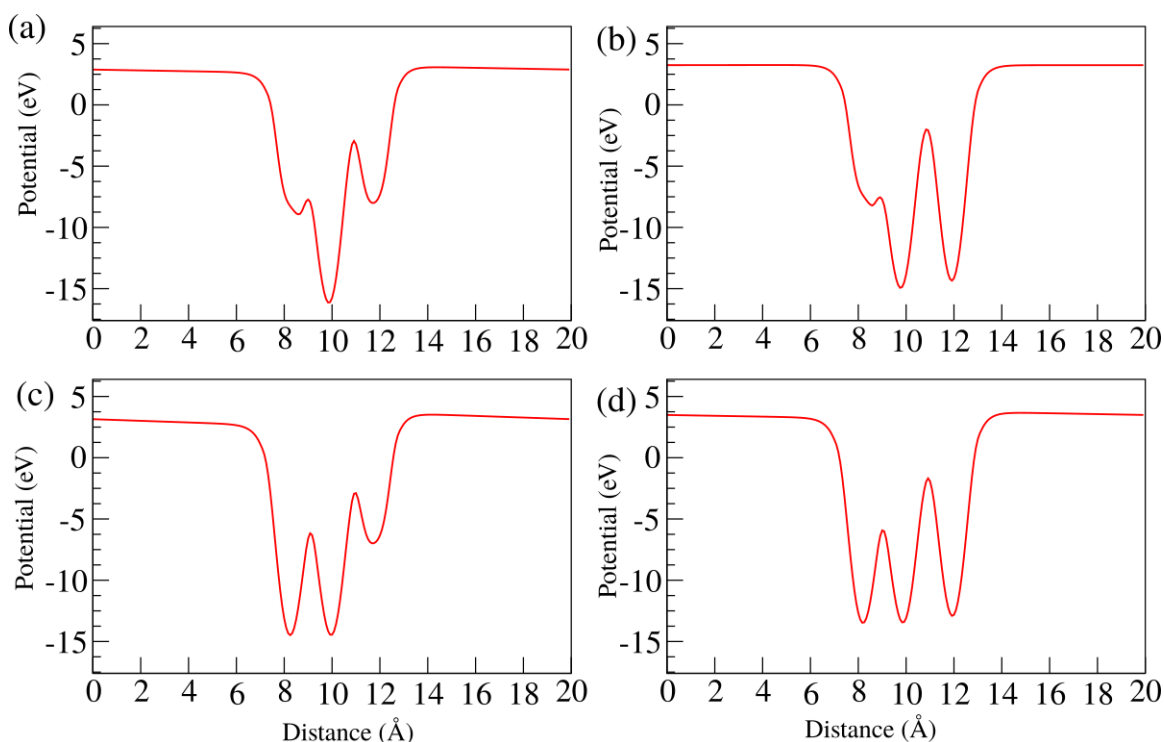

Figure S1: Electrostatic potential of the (a) SbSeBr, (b) SbSeI, (c) SbTeBr and (d) SbTeI monolayers.

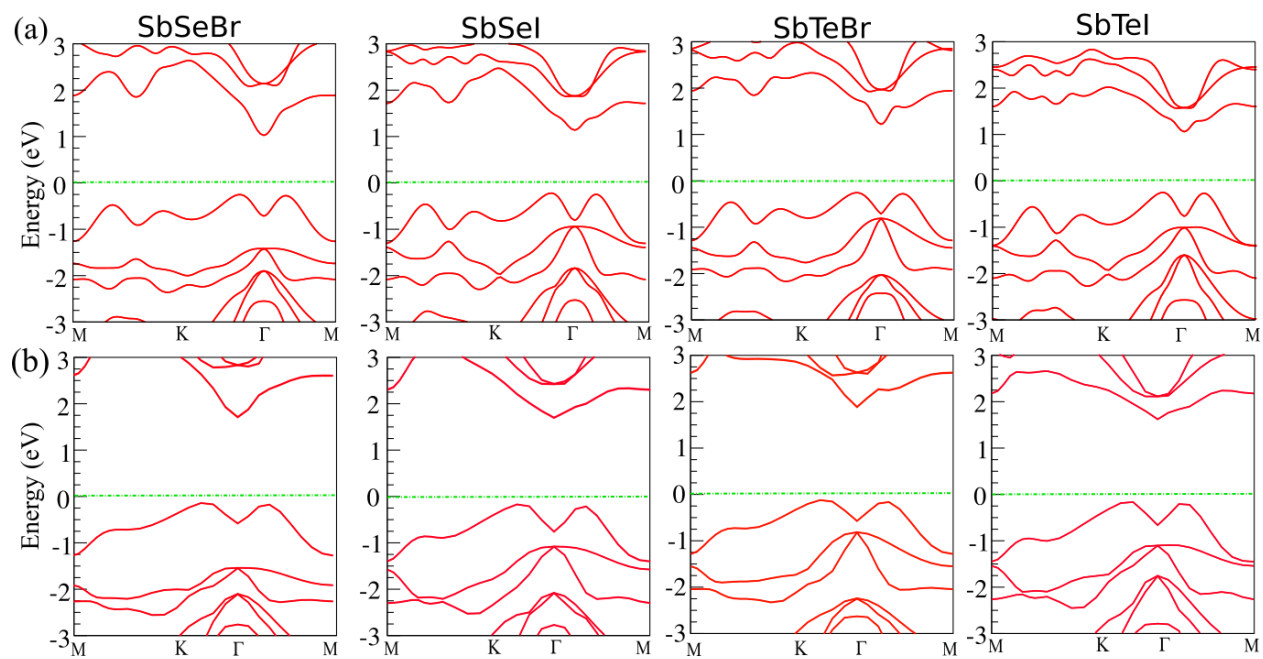

Figure S2: Electronic band structure using (a) PBE and (b) HSE of the SbSeBr, SbSeI, SbTeBr and, SbTeI monolayers.
